# Supplementary material for: Improved safety of induced pluripotent stem cell-derived antigen-presenting cell-based cancer immunotherapy
Source: PubMed Central journal article supplement — Mol Ther Methods Clin Dev. 2021 Mar 5;21:171–9. doi: 10.1016/j.omtm.2021.03.002 (PMC7994724; doi:10.1016/j.omtm.2021.03.002), 2021-03-05
Supplement: mmc1.pdf [file mmc1.pdf]

**Supplemental information**

**Improved safety of induced pluripotent  
stem cell-derived antigen-presenting  
cell-based cancer immunotherapy**

**Hiroaki Mashima, Rong Zhang, Tsuyoshi Kobayashi, Hirotake Tsukamoto, Tianyi Liu, Tatsuaki Iwama, Yuichiro Hagiya, Masateru Yamamoto, Satoshi Fukushima, Seiji Okada, Alimjan Idiris, Shin Kaneko, Tetsuya Nakatsura, Hideki Ohdan, and Yasushi Uemura**

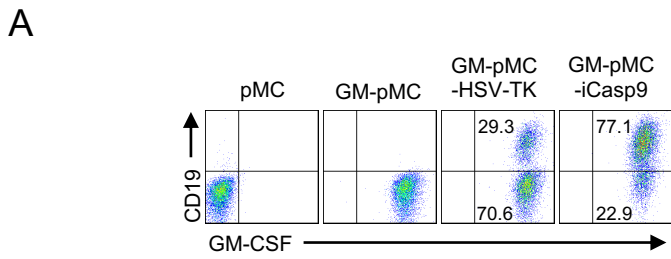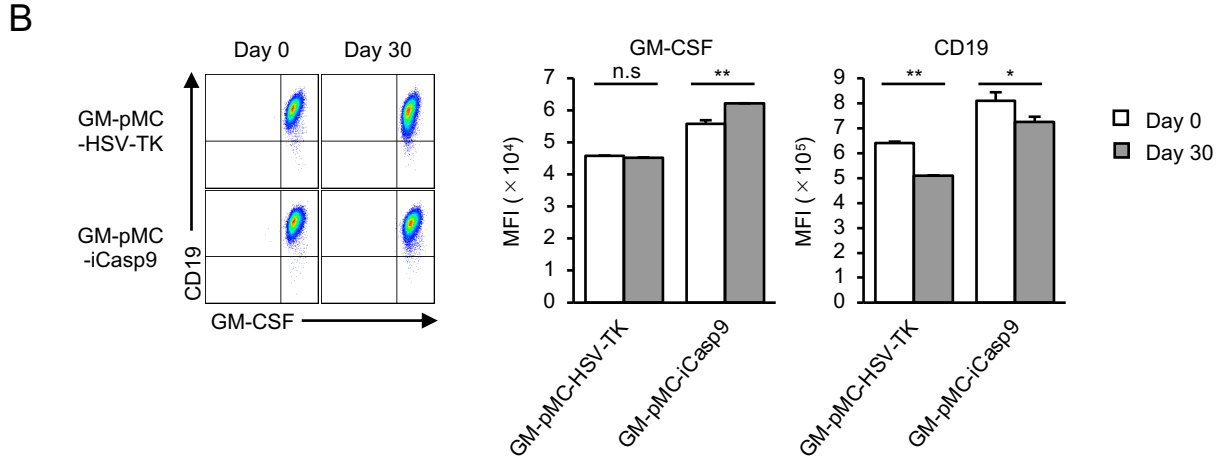

**Figure S1, related to Figure 1. Efficiency and stability of EF1 $\alpha$  promotor-mediated suicide gene expression in GM-pMCs**

(A) Initial transduction rates for GM-pMC-HSV-TK and GM-pMC-iCasp9 were evaluated using flow cytometry.

(B) Cells were cultured for 30 days in the presence of GM-CSF and M-CSF. The expression levels of GM-CSF and each suicide gene were evaluated using flow cytometry at the indicated time points. Left-hand panels, representative flow cytometry profiles. Right-hand panels, mean fluorescence intensity (MFI). Data shown are the means  $\pm$  S.D. of triplicate cultures. \* $p < .05$ , \*\* $p < .01$ .

A

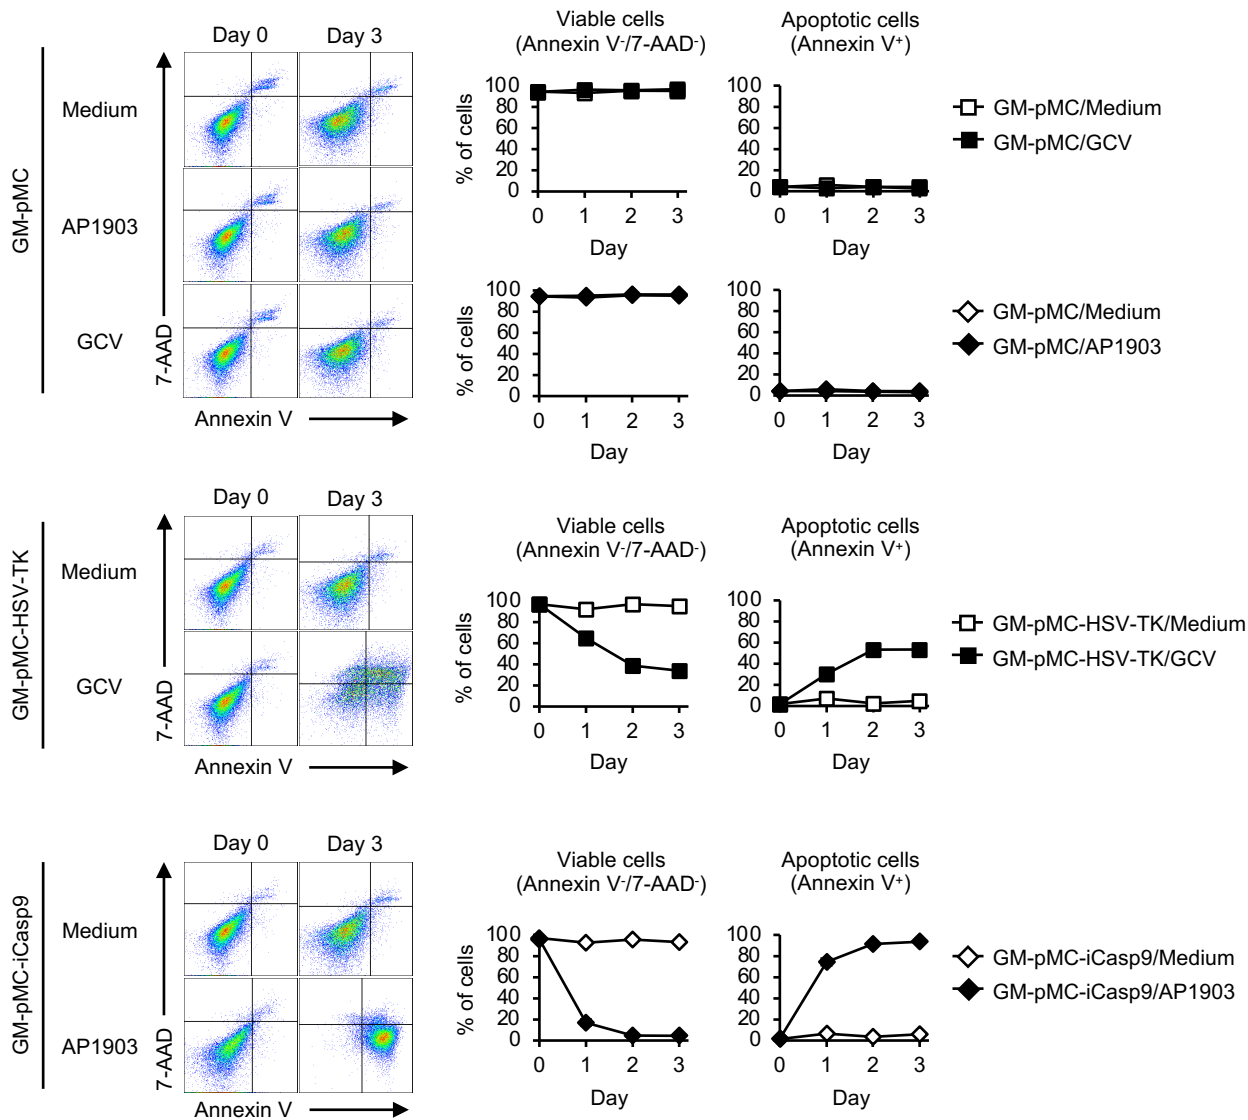

B

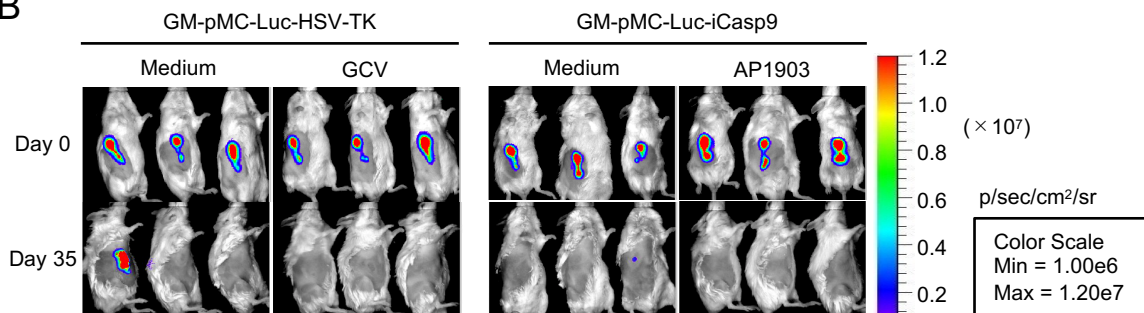

**Figure S2, related to Figure 3 and Figure 4. Both HSV-TK/GCV and iCasp9/AP1903 induce apoptosis specifically in suicide gene-expressing cells.**

(A) Cells ( $2.0 \times 10^5$ /well) were seeded in 24-well culture plates in the presence of 10  $\mu$ M GCV or 10 nM AP1903. The viability of the cells was evaluated using Annexin/7-AAD staining at the indicated time points. The medium served as a control. Left panels, representative flow cytometry profiles. Right panels show the percentage of viable cells (Annexin V<sup>-</sup>/7-AAD<sup>-</sup>) and apoptotic cells (Annexin V<sup>+</sup>) at the indicated time points. Data shown are the means  $\pm$  S.D. of triplicate cultures and are representative of two independent experiments.

(B) BALB/c Rag2<sup>-/-</sup>Jak3<sup>-/-</sup> mice were inoculated s.c. with the luciferase-expressing GM-pMC-HSV-TK or GM-pMC-iCasp9, and treated with GCV or AP1903 as in **Figure 4**. Bioluminescence images of representative mice from one experiment are shown (n = 7 to 8 mice).

A

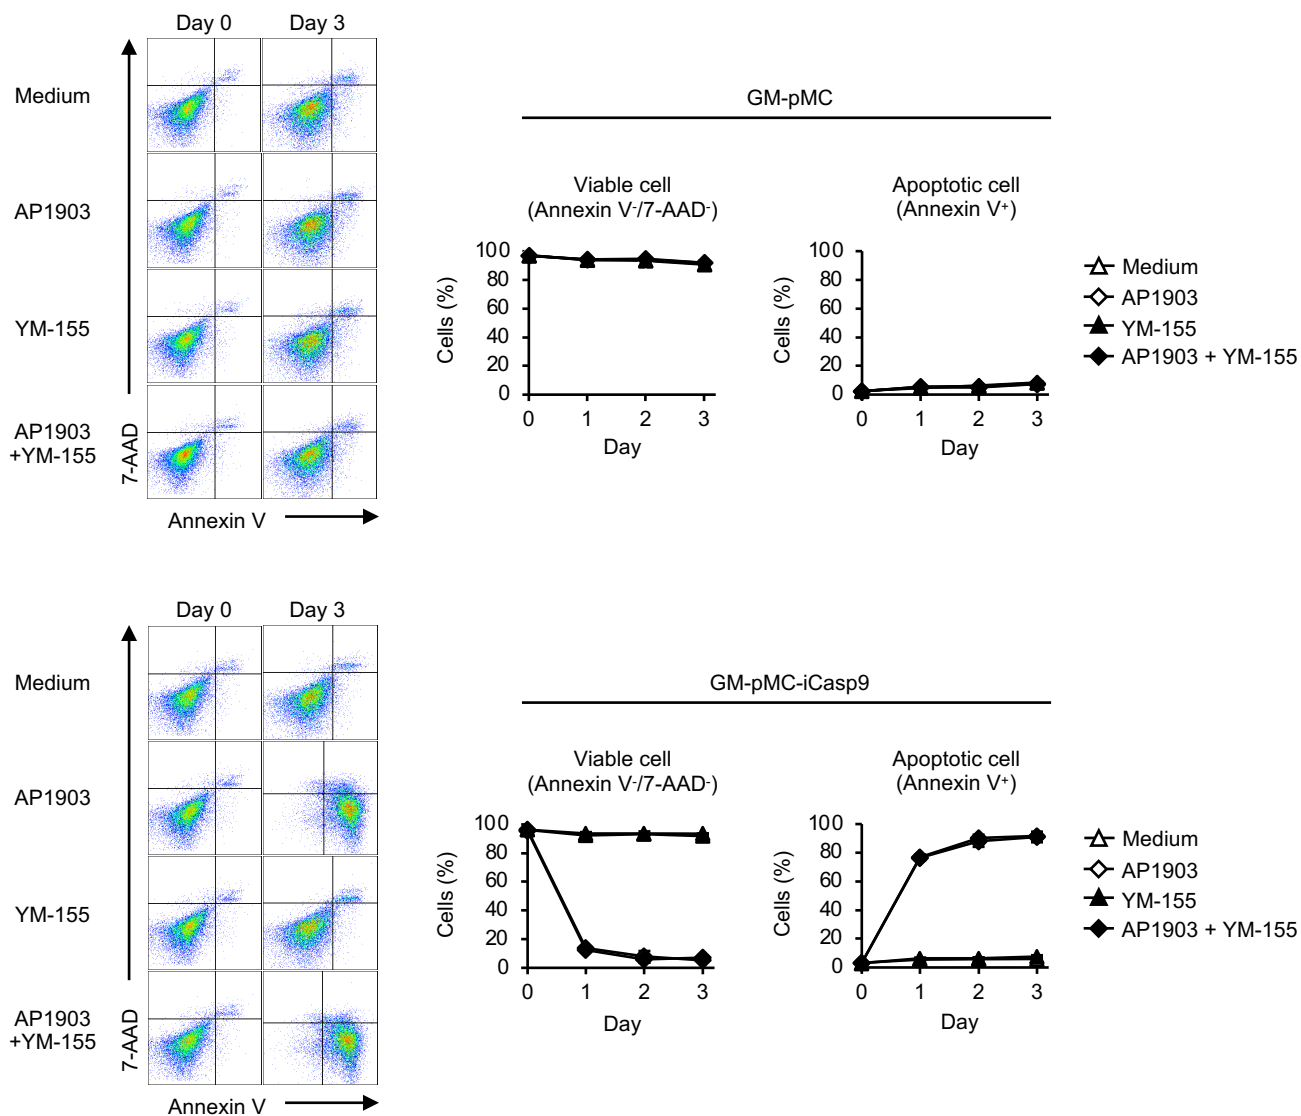

B

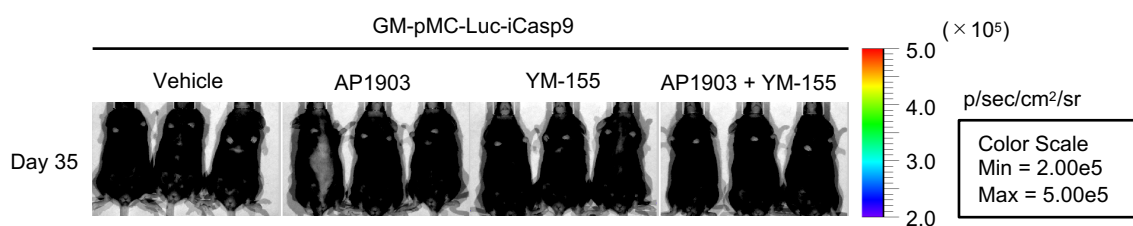

### Figure S3, related to Figure 5. Survivin inhibitor does not affect the viability of GM-pMC.

(A) Cells ( $2.0 \times 10^5$ /well) were seeded in 24-well culture plates in the presence of 10 nM AP1903 and/or 10 nM YM-155. Medium served as a control. The viability of the cells was evaluated using Annexin/7-AAD staining at the indicated time points as in Figure S1. Left panels, representative flow cytometry profiles. Right panels, the graphs show the percentage of viable cells (Annexin V<sup>-</sup>/7-AAD<sup>-</sup>) and apoptotic cells (Annexin V<sup>+</sup>) at the indicated time points. Data shown are the means  $\pm$  S.D. of triplicate cultures and are representative of two independent experiments.

(B) C57BL/6 mice were s.c. inoculated with the luciferase-expressing GM-pMC-iCasp9 ( $1.0 \times 10^6$  cells) and i.p. treated with 2.5 mg/kg AP1903 and/or 5 mg/kg YM-155 for 5 consecutive days as in Figure 5C. Bioluminescence images of representative mice from one experiment are shown (n = 8 to 9 mice).

**Table S1. Antibodies for flow cytometry**

| <b>Antibody</b>                                                              | <b>Company</b>          | <b>Product #</b> |
|------------------------------------------------------------------------------|-------------------------|------------------|
| APC anti-mouse/human CD11b antibody                                          | BioLegend               | 101211           |
| APC Rat IgG2b, kappa Isotype Ctrl antibody                                   | BioLegend               | 400611           |
| PE anti-mouse CD11c antibody                                                 | BioLegend               | 117307           |
| Armenian Hamster IgG, Isotype Control, PE Conjugated, Clone HTK888 antibody  | BioLegend               | 400907           |
| PE anti-mouse/human CD45R/B220 antibody                                      | BioLegend               | 103207           |
| PE Rat IgG2a, κ Isotype Ctrl Antibody                                        | BioLegend               | 400508           |
| PE anti-mouse F4/80 antibody                                                 | BioLegend               | 123109           |
| PE anti-mouse Ly-6G/Ly-6C (Gr-1) antibody                                    | BioLegend               | 108407           |
| PE anti-mouse CD205 (DEC-205) antibody                                       | BioLegend               | 138213           |
| CD33 Monoclonal Antibody (9A11-CD33), PE, eBioscience™                       | ThermoFisher Scientific | 12-0331-82       |
| Rat IgG1 kappa Isotype Control (eBRG1), PE, eBioscience™ antibody            | ThermoFisher Scientific | 12-4301-82       |
| CD40 Monoclonal Antibody (1C10), PE, eBioscience™                            | ThermoFisher Scientific | 12-0401-82       |
| Rat IgG2a kappa Isotype Control (eBR2a), PE, eBioscience™ antibody           | ThermoFisher Scientific | 12-4321-80       |
| CD80 (B7-1) Monoclonal Antibody (16-10A1), PE, eBioscience™                  | ThermoFisher Scientific | 12-0801-82       |
| Armenian Hamster IgG Isotype Control (eBio299Arm), PE, eBioscience™ antibody | ThermoFisher Scientific | 12-4888-81       |
| CD86 (B7-2) Monoclonal Antibody (GL1), PE, eBioscience™                      | ThermoFisher Scientific | 12-0862-81       |
| PE anti-mouse H-2K <sup>b</sup> /H-2D <sup>b</sup> antibody                  | BioLegend               | 114607           |
| PE Mouse IgG2a, κ Isotype Ctrl Antibody                                      | BioLegend               | 400212           |
| PE anti-mouse I-A/I-E antibody                                               | BioLegend               | 107607           |
| PE Rat IgG2b, kappa Isotype Ctrl antibody                                    | BioLegend               | 400607           |
| APC anti-human CD19 Antibody                                                 | BioLegend               | 302211           |
| APC Mouse IgG1, κ Isotype Ctrl Antibody                                      | BioLegend               | 400119           |
| PC Annexin V Apoptosis Detection Kit with 7-AAD                              | BioLegend               | 640930           |
